# Supplementary material for: Dual VEGFA/BRAF targeting boosts PD‐1 blockade in melanoma through GM‐CSF‐mediated infiltration of M1 macrophages
Source: PubMed Central journal article supplement (PMC10399721; doi:10.1002/1878-0261.13450), 2023-05-27
Supplement: MOL2-17-1474-s002.pdf [file MOL2-17-1474-s002.pdf]

**Table S3. Log2 Fold Change Real Time PCR analysis of macrophages polarization**

| Gene   | Control (n=4) | BRAFi (n=4) | anti-mVEGF-A (n=4) | BRAFi + anti-mVEGF-A (n=4) |
|--------|---------------|-------------|--------------------|----------------------------|
| Cxcl10 | 0.005         | 2.985       | 2.525              | 3.540                      |
| Cd40   | 0.005         | 3.960       | 3.275              | 4.460                      |
| Cd86   | 0.000         | 2.055       | 1.535              | 2.480                      |
| Cxcl9  | 0.000         | 3.875       | 3.960              | 5.170                      |
| Ccl5   | 0.000         | 5.505       | 3.400              | 6.140                      |
| Tnfa   | 0.000         | 2.995       | 0.695              | 2.345                      |
| Nos2   | -0.435        | 1.205       | 4.985              | 3.240                      |
|        |               |             |                    |                            |
| Arg1   | 0.000         | -2.935      | 2.340              | -0.585                     |
