# Supplementary material for: Dual VEGFA/BRAF targeting boosts PD‐1 blockade in melanoma through GM‐CSF‐mediated infiltration of M1 macrophages
Source: PubMed Central journal article supplement (PMC10399721; doi:10.1002/1878-0261.13450), 2023-05-27
Supplement: MOL2-17-1474-s003.pdf [file MOL2-17-1474-s003.pdf]

**Table S2. Differential expression of Receptor upon treatments including p value, BH adjusted and log2ratio comparing each condition against the controls**

| Gene Symbol      | Gene Function | log 2 ratio BRAFi vs CTRL | p value adjusted BRAFi vs CTRL | log 2 ratio anti-hVEGF-A vs CTRL | p value adjusted anti-hVEGF-A vs CTRL | log 2 ratio BRAFi + anti-hVEGF-A vs CTRL | p value adjusted BRAFi + anti-hVEGF-A vs CTRL |
|------------------|---------------|---------------------------|--------------------------------|----------------------------------|---------------------------------------|------------------------------------------|-----------------------------------------------|
| <i>Acvr1</i>     | Receptor      | 0.202                     | 0.776                          | 0.733                            | 0.244                                 | -0.017                                   | 0.993                                         |
| <i>Fzd2</i>      | Receptor      | 0.305                     | 0.380                          | 0.124                            | 0.900                                 | -0.006                                   | 0.993                                         |
| <i>Il1rap</i>    | Receptor      | -0.008                    | 0.964                          | -0.114                           | 0.852                                 | -0.001                                   | 0.993                                         |
| <i>Tlr2</i>      | Receptor      | 1.007                     | 0.017                          | 0.235                            | 0.459                                 | -0.113                                   | 0.970                                         |
| <i>Mertk</i>     | Receptor      | 0.434                     | 0.420                          | -0.032                           | 0.980                                 | -0.097                                   | 0.968                                         |
| <i>Tnfrsf11a</i> | Receptor      | 0.109                     | 0.865                          | -0.388                           | 0.764                                 | -0.131                                   | 0.935                                         |
| <i>Sdc4</i>      | Receptor      | 0.320                     | 0.699                          | 0.409                            | 0.811                                 | 0.105                                    | 0.921                                         |
| <i>Avpr1a</i>    | Receptor      | 0.303                     | 0.608                          | -0.094                           | 0.900                                 | 0.194                                    | 0.904                                         |
| <i>Ephb1</i>     | Receptor      | 0.051                     | 0.921                          | -0.570                           | 0.417                                 | -0.209                                   | 0.904                                         |
| <i>ErbB2</i>     | Receptor      | 0.107                     | 0.776                          | 0.083                            | 0.943                                 | 0.071                                    | 0.904                                         |
| <i>Fzd7</i>      | Receptor      | -0.070                    | 0.837                          | 0.129                            | 0.900                                 | -0.067                                   | 0.904                                         |
| <i>Il10ra</i>    | Receptor      | 0.974                     | 0.043                          | 0.417                            | 0.331                                 | 0.177                                    | 0.904                                         |
| <i>Notch1</i>    | Receptor      | 0.122                     | 0.699                          | -0.571                           | 0.244                                 | 0.062                                    | 0.904                                         |
| <i>Cd44</i>      | Receptor      | -0.423                    | 0.654                          | 0.118                            | 0.900                                 | -0.077                                   | 0.903                                         |
| <i>Itgb6</i>     | Receptor      | 0.181                     | 0.776                          | -0.431                           | 0.396                                 | 0.247                                    | 0.874                                         |
| <i>Lrp6</i>      | Receptor      | -0.373                    | 0.635                          | -0.715                           | 0.361                                 | -0.208                                   | 0.873                                         |
| <i>Kit</i>       | Receptor      | -0.119                    | 0.732                          | -0.626                           | 0.331                                 | -0.231                                   | 0.852                                         |
| <i>Ptpn6</i>     | Receptor      | 0.391                     | 0.260                          | 0.367                            | 0.353                                 | -0.335                                   | 0.834                                         |
| <i>Cxcr4</i>     | Receptor      | -0.120                    | 0.687                          | 0.064                            | 0.943                                 | -0.299                                   | 0.799                                         |
| <i>Tnfrsf11b</i> | Receptor      | 0.099                     | 0.837                          | -0.007                           | 0.988                                 | 0.326                                    | 0.799                                         |
| <i>Il10rb</i>    | Receptor      | 0.315                     | 0.654                          | 0.425                            | 0.732                                 | 0.379                                    | 0.769                                         |
| <i>Brs3</i>      | Receptor      | -0.093                    | 0.776                          | -0.171                           | 0.852                                 | -0.185                                   | 0.754                                         |
| <i>Ccr5</i>      | Receptor      | -0.706                    | 0.588                          | 0.214                            | 0.900                                 | -0.865                                   | 0.754                                         |
| <i>Ednra</i>     | Receptor      | 0.662                     | 0.339                          | -0.017                           | 0.988                                 | 0.530                                    | 0.754                                         |
| <i>Egfr</i>      | Receptor      | 1.068                     | 0.339                          | 0.116                            | 0.949                                 | 0.788                                    | 0.754                                         |
| <i>Fgfr1</i>     | Receptor      | 0.507                     | 0.310                          | 0.243                            | 0.735                                 | 0.227                                    | 0.754                                         |
| <i>Nrp1</i>      | Receptor      | 0.467                     | 0.252                          | -0.395                           | 0.479                                 | 0.168                                    | 0.754                                         |
| <i>Pdgfra</i>    | Receptor      | 1.045                     | 0.339                          | 0.378                            | 0.853                                 | 0.702                                    | 0.754                                         |
| <i>Tgfb3</i>     | Receptor      | 0.703                     | 0.515                          | 0.132                            | 0.943                                 | -0.483                                   | 0.754                                         |
| <i>Tlr4</i>      | Receptor      | 0.200                     | 0.687                          | -0.130                           | 0.900                                 | -0.460                                   | 0.754                                         |
| <i>Tnfrsf4</i>   | Receptor      | -0.099                    | 0.762                          | -0.159                           | 0.900                                 | 0.283                                    | 0.754                                         |
| <i>Fzd5</i>      | Receptor      | 0.547                     | 0.260                          | -0.142                           | 0.900                                 | 0.493                                    | 0.735                                         |
| <i>Csf2ra</i>    | Receptor      | 0.362                     | 0.635                          | 0.107                            | 0.943                                 | 0.380                                    | 0.710                                         |
| <i>Cx3cr1</i>    | Receptor      | -0.146                    | 0.742                          | -0.517                           | 0.361                                 | -1.143                                   | 0.710                                         |
| <i>Il11ra1</i>   | Receptor      | 0.843                     | 0.252                          | 0.125                            | 0.900                                 | 0.764                                    | 0.710                                         |
| <i>Acvr1b</i>    | Receptor      | 0.352                     | 0.553                          | 0.291                            | 0.717                                 | 0.290                                    | 0.706                                         |
| <i>Bmpr1a</i>    | Receptor      | 1.061                     | 0.170                          | -0.061                           | 0.963                                 | 0.898                                    | 0.706                                         |
| <i>Fzd6</i>      | Receptor      | 0.293                     | 0.403                          | 0.111                            | 0.811                                 | 0.682                                    | 0.706                                         |
| <i>Rgma</i>      | Receptor      | 0.542                     | 0.339                          | 0.060                            | 0.900                                 | 0.815                                    | 0.706                                         |
| <i>Il17rc</i>    | Receptor      | 0.709                     | 0.063                          | 0.302                            | 0.735                                 | 1.140                                    | 0.703                                         |
| <i>Mela</i>      | Receptor      | 1.675                     | 0.371                          | 1.302                            | 0.582                                 | 1.245                                    | 0.702                                         |
| <i>Epha3</i>     | Receptor      | 0.289                     | 0.635                          | -0.007                           | 0.988                                 | -0.180                                   | 0.702                                         |
| <i>Ltbr</i>      | Receptor      | 0.453                     | 0.380                          | 0.121                            | 0.900                                 | -0.305                                   | 0.702                                         |
| <i>Sostdc1</i>   | Receptor      | -0.083                    | 0.339                          | 0.002                            | 0.988                                 | 1.077                                    | 0.702                                         |
| <i>Fzd1</i>      | Receptor      | 0.630                     | 0.077                          | 0.121                            | 0.732                                 | 0.873                                    | 0.695                                         |
| <i>Sphk2</i>     | Receptor      | 0.253                     | 0.715                          | -0.296                           | 0.764                                 | -0.262                                   | 0.638                                         |
| <i>Il15ra</i>    | Receptor      | 1.331                     | 0.043                          | 0.443                            | 0.459                                 | 0.458                                    | 0.628                                         |
| <i>Il1r2</i>     | Receptor      | 0.512                     | 0.403                          | 0.670                            | 0.361                                 | 0.933                                    | 0.628                                         |
| <i>Itgb1</i>     | Receptor      | 0.083                     | 0.806                          | 0.026                            | 0.988                                 | -0.488                                   | 0.628                                         |
| <i>Epha2</i>     | Receptor      | -0.105                    | 0.635                          | 0.123                            | 0.732                                 | -0.131                                   | 0.555                                         |
| <i>Il6ra</i>     | Receptor      | 0.777                     | 0.260                          | 0.754                            | 0.331                                 | 0.671                                    | 0.549                                         |
| <i>Tnfrsf9</i>   | Receptor      | -0.123                    | 0.654                          | 0.334                            | 0.703                                 | -0.330                                   | 0.549                                         |
| <i>Galr2</i>     | Receptor      | 0.997                     | 0.043                          | -0.082                           | 0.459                                 | 0.614                                    | 0.545                                         |
| <i>Il27ra</i>    | Receptor      | 0.720                     | 0.130                          | 0.129                            | 0.900                                 | 0.985                                    | 0.545                                         |
| <i>Il6st</i>     | Receptor      | 0.499                     | 0.252                          | -0.025                           | 0.900                                 | 0.265                                    | 0.476                                         |
| <i>Tgfb1</i>     | Receptor      | 0.656                     | 0.099                          | -0.134                           | 0.852                                 | 0.509                                    | 0.408                                         |
| <i>Tgfb2</i>     | Receptor      | 1.034                     | 0.043                          | 0.148                            | 0.852                                 | 0.407                                    | 0.408                                         |
| <i>Itgb5</i>     | Receptor      | 0.483                     | 0.260                          | -0.015                           | 0.988                                 | 0.459                                    | 0.381                                         |
| <i>Cxcr3</i>     | Receptor      | 0.323                     | 0.260                          | 0.103                            | 0.417                                 | 0.993                                    | 0.375                                         |
| <i>Darc</i>      | Receptor      | 1.116                     | 0.252                          | 0.727                            | 0.459                                 | 1.195                                    | 0.331                                         |
| <i>Il12rb1</i>   | Receptor      | 0.083                     | 0.528                          | 0.127                            | 0.246                                 | 0.175                                    | 0.331                                         |
| <i>Sort1</i>     | Receptor      | 0.908                     | 0.339                          | -0.052                           | 0.952                                 | 1.805                                    | 0.331                                         |
| <i>Cd27</i>      | Receptor      | 0.615                     | 0.260                          | 0.516                            | 0.246                                 | 1.488                                    | 0.269                                         |
| <i>Il18r1</i>    | Receptor      | 0.742                     | 0.100                          | 0.073                            | 0.749                                 | 1.770                                    | 0.269                                         |
| <i>Ly96</i>      | Receptor      | 0.824                     | 0.260                          | 0.829                            | 0.246                                 | 1.249                                    | 0.269                                         |
| <i>Ptprb</i>     | Receptor      | -0.141                    | 0.654                          | -0.384                           | 0.361                                 | -0.749                                   | 0.269                                         |
| <i>Ephb4</i>     | Receptor      | -0.399                    | 0.283                          | -0.341                           | 0.396                                 | -1.010                                   | 0.096                                         |
| <i>Tlr1</i>      | Receptor      | 0.399                     | 0.339                          | -0.234                           | 0.852                                 | 0.691                                    | 0.085                                         |
| <i>Pdgfrb</i>    | Receptor      | 0.858                     | 0.298                          | 0.006                            | 0.988                                 | -0.747                                   | 0.080                                         |
| <i>Ednrb</i>     | Receptor      | -0.477                    | 0.100                          | -1.023                           | 0.212                                 | -1.136                                   | 0.049                                         |
| <i>Ramp3</i>     | Receptor      | -1.539                    | 0.037                          | -0.562                           | 0.459                                 | -1.397                                   | 0.049                                         |
| <i>Flt1</i>      | Receptor      | -0.916                    | 0.007                          | -0.900                           | 0.005                                 | -1.220                                   | 0.044                                         |
