# Supplementary material for: Dual VEGFA/BRAF targeting boosts PD‐1 blockade in melanoma through GM‐CSF‐mediated infiltration of M1 macrophages
Source: PubMed Central journal article supplement (PMC10399721; doi:10.1002/1878-0261.13450), 2023-05-27
Supplement: MOL2-17-1474-s004.pdf [file MOL2-17-1474-s004.pdf]

**Table S1.** Differential expression of ligand upon treatments including p value, BH adjusted and log2ratio comparing each condition against the controls

| Gene Symbol | Gene Function | log 2 ratio BRAFi vs CTRL | p value adjusted BRAFi vs CTRL | log 2 ratio anti-hVEGF-A vs CTRL | p value adjusted anti-hVEGF-A vs CTRL | log 2 ratio BRAFi + anti-hVEGF-A vs CTRL | p value adjusted BRAFi + anti-hVEGF-A vs CTRL |
|-------------|---------------|---------------------------|--------------------------------|----------------------------------|---------------------------------------|------------------------------------------|-----------------------------------------------|
| CSF2        | Ligand        | 1.223                     | 0.187                          | 0.167                            | 0.733                                 | 2.179                                    | 0.029                                         |
| CCL2        | Ligand        | 2.765                     | 0.036                          | 0.062                            | 0.945                                 | 2.162                                    | 0.108                                         |
| CXCL10      | Ligand        | 1.879                     | 0.036                          | -0.023                           | 0.945                                 | 2.069                                    | 0.029                                         |
| UTS2        | Ligand        | 2.957                     | 0.221                          | -0.218                           | 0.945                                 | 2.032                                    | 0.405                                         |
| IL8         | Ligand        | 1.233                     | 0.036                          | 0.340                            | 0.466                                 | 1.678                                    | 0.029                                         |
| CXCL16      | Ligand        | 1.009                     | 0.122                          | -0.107                           | 0.896                                 | 1.145                                    | 0.392                                         |
| CX3CL1      | Ligand        | 0.860                     | 0.112                          | -0.444                           | 0.466                                 | 1.073                                    | 0.103                                         |
| LTB         | Ligand        | 0.492                     | 0.221                          | 0.186                            | 0.466                                 | 1.033                                    | 0.296                                         |
| CCL27       | Ligand        | 0.056                     | 0.804                          | 0.000                            | 0.999                                 | 1.029                                    | 0.474                                         |
| TGFB3       | Ligand        | 1.246                     | 0.036                          | -0.389                           | 0.466                                 | 1.006                                    | 0.221                                         |
| TNFSF14     | Ligand        | 0.214                     | 0.767                          | 0.542                            | 0.577                                 | 1.000                                    | 0.029                                         |
| FGF2        | Ligand        | 0.484                     | 0.197                          | -0.063                           | 0.896                                 | 0.986                                    | 0.254                                         |
| IL18        | Ligand        | 0.108                     | 0.894                          | 0.311                            | 0.746                                 | 0.950                                    | 0.029                                         |
| CXCL1       | Ligand        | 1.150                     | 0.011                          | 0.182                            | 0.733                                 | 0.941                                    | 0.405                                         |
| IL15        | Ligand        | 0.443                     | 0.138                          | 0.073                            | 0.849                                 | 0.903                                    | 0.241                                         |
| BTC         | Ligand        | 0.921                     | 0.258                          | 0.108                            | 0.733                                 | 0.806                                    | 0.222                                         |
| PDGFD       | Ligand        | 0.277                     | 0.801                          | -0.491                           | 0.733                                 | 0.776                                    | 0.640                                         |
| TNFSF4      | Ligand        | 0.114                     | 0.652                          | -0.215                           | 0.733                                 | 0.711                                    | 0.421                                         |
| CXCL2       | Ligand        | 0.637                     | 0.315                          | 0.250                            | 0.733                                 | 0.705                                    | 0.221                                         |
| BMP6        | Ligand        | 0.425                     | 0.207                          | 0.235                            | 0.469                                 | 0.672                                    | 0.515                                         |
| BMP5        | Ligand        | 0.665                     | 0.122                          | -0.027                           | 0.945                                 | 0.650                                    | 0.515                                         |
| IL10        | Ligand        | -0.146                    | 0.880                          | 0.382                            | 0.733                                 | 0.627                                    | 0.158                                         |
| BDNF        | Ligand        | 0.375                     | 0.524                          | -0.165                           | 0.777                                 | 0.623                                    | 0.221                                         |
| FGF18       | Ligand        | 0.040                     | 0.846                          | 0.224                            | 0.466                                 | 0.600                                    | 0.415                                         |
| FBN1        | Ligand        | 0.509                     | 0.122                          | -0.045                           | 0.733                                 | 0.545                                    | 0.405                                         |
| PTN         | Ligand        | 0.263                     | 0.721                          | -0.242                           | 0.777                                 | 0.536                                    | 0.608                                         |
| JAG1        | Ligand        | 0.525                     | 0.215                          | -0.146                           | 0.733                                 | 0.531                                    | 0.405                                         |
| WNT7A       | Ligand        | 0.129                     | 0.807                          | 0.549                            | 0.659                                 | 0.445                                    | 0.692                                         |
| SPP1        | Ligand        | 0.704                     | 0.687                          | 0.395                            | 0.733                                 | 0.430                                    | 0.618                                         |
| IL12A       | Ligand        | 0.233                     | 0.415                          | 0.075                            | 0.890                                 | 0.402                                    | 0.260                                         |
| IL25        | Ligand        | 0.030                     | 0.904                          | 0.055                            | 0.896                                 | 0.372                                    | 0.640                                         |
| EFNA1       | Ligand        | -0.161                    | 0.554                          | -0.041                           | 0.896                                 | 0.345                                    | 0.666                                         |
| CXCL14      | Ligand        | -0.395                    | 0.654                          | 0.924                            | 0.466                                 | 0.330                                    | 0.731                                         |
| VEGFA       | Ligand        | -1.058                    | 0.140                          | 0.243                            | 0.733                                 | 0.277                                    | 0.692                                         |
| PDGFC       | Ligand        | -0.107                    | 0.804                          | -0.137                           | 0.733                                 | 0.261                                    | 0.598                                         |
| BMP7        | Ligand        | -0.381                    | 0.652                          | -0.360                           | 0.733                                 | 0.213                                    | 0.866                                         |
| CRLF1       | Ligand        | -0.283                    | 0.449                          | -0.183                           | 0.733                                 | 0.161                                    | 0.770                                         |
| IL1A        | Ligand        | 0.064                     | 0.807                          | 0.190                            | 0.665                                 | 0.117                                    | 0.608                                         |
| KITLG       | Ligand        | 0.179                     | 0.178                          | 0.019                            | 0.890                                 | 0.102                                    | 0.429                                         |
| BMP4        | Ligand        | -0.647                    | 0.218                          | -0.293                           | 0.733                                 | 0.098                                    | 0.863                                         |
| LIF         | Ligand        | 0.508                     | 0.576                          | 0.208                            | 0.733                                 | 0.065                                    | 0.948                                         |
| EFNB1       | Ligand        | 0.680                     | 0.457                          | 0.185                            | 0.780                                 | 0.065                                    | 0.918                                         |
| TNFSF11     | Ligand        | 0.175                     | 0.721                          | -0.141                           | 0.733                                 | 0.045                                    | 0.918                                         |
| CCL20       | Ligand        | 0.577                     | 0.036                          | 0.217                            | 0.466                                 | 0.038                                    | 0.954                                         |
| HBEGF       | Ligand        | 0.774                     | 0.267                          | 0.415                            | 0.466                                 | 0.030                                    | 0.948                                         |
| IL1F7       | Ligand        | 0.001                     | 0.996                          | -0.018                           | 0.945                                 | 0.005                                    | 0.970                                         |
| VEGFB       | Ligand        | -0.389                    | 0.253                          | -0.134                           | 0.733                                 | -0.011                                   | 0.970                                         |
| SEMA3A      | Ligand        | 0.513                     | 0.256                          | 0.151                            | 0.746                                 | -0.047                                   | 0.948                                         |
| IL6         | Ligand        | 0.523                     | 0.122                          | 0.076                            | 0.890                                 | -0.050                                   | 0.917                                         |
| TNFSF15     | Ligand        | 0.588                     | 0.576                          | 0.525                            | 0.583                                 | -0.095                                   | 0.880                                         |
| TNFSF12     | Ligand        | 0.434                     | 0.626                          | -0.082                           | 0.945                                 | -0.110                                   | 0.917                                         |
| LEFTY1      | Ligand        | 0.148                     | 0.652                          | -0.176                           | 0.733                                 | -0.125                                   | 0.640                                         |
| NRG1        | Ligand        | 0.285                     | 0.658                          | 0.062                            | 0.896                                 | -0.172                                   | 0.866                                         |
| WNT5A       | Ligand        | -0.132                    | 0.801                          | -0.180                           | 0.733                                 | -0.191                                   | 0.640                                         |
| GNPMB       | Ligand        | 0.182                     | 0.721                          | -0.459                           | 0.466                                 | -0.206                                   | 0.608                                         |
| TGFA        | Ligand        | -0.598                    | 0.122                          | -0.081                           | 0.788                                 | -0.235                                   | 0.640                                         |
| WNT3        | Ligand        | -0.599                    | 0.122                          | -0.055                           | 0.814                                 | -0.254                                   | 0.770                                         |
| TNFSF9      | Ligand        | -0.344                    | 0.449                          | 0.245                            | 0.733                                 | -0.320                                   | 0.405                                         |
| ADM2        | Ligand        | -0.182                    | 0.658                          | -0.199                           | 0.733                                 | -0.332                                   | 0.421                                         |
| BMP2        | Ligand        | -0.457                    | 0.267                          | 0.025                            | 0.945                                 | -0.345                                   | 0.731                                         |
| HMGB1L1     | Ligand        | -0.423                    | 0.652                          | 0.425                            | 0.466                                 | -0.400                                   | 0.640                                         |
| INHA        | Ligand        | -0.223                    | 0.576                          | 0.331                            | 0.659                                 | -0.437                                   | 0.029                                         |
| AVP         | Ligand        | -0.179                    | 0.267                          | 0.005                            | 0.979                                 | -0.442                                   | 0.392                                         |
| EDN3        | Ligand        | -0.270                    | 0.891                          | -1.063                           | 0.733                                 | -0.457                                   | 0.866                                         |
| EBI3        | Ligand        | -0.104                    | 0.721                          | 0.185                            | 0.733                                 | -0.518                                   | 0.405                                         |
| GAL         | Ligand        | -0.214                    | 0.626                          | 0.067                            | 0.896                                 | -0.522                                   | 0.034                                         |
| NRG2        | Ligand        | 0.025                     | 0.944                          | -0.226                           | 0.733                                 | -0.551                                   | 0.332                                         |
| WNT7B       | Ligand        | -0.379                    | 0.721                          | 0.175                            | 0.777                                 | -0.631                                   | 0.115                                         |
| DKK1        | Ligand        | -0.831                    | 0.284                          | -0.837                           | 0.466                                 | -0.667                                   | 0.598                                         |
| WNT10B      | Ligand        | -0.179                    | 0.767                          | -0.154                           | 0.788                                 | -0.713                                   | 0.221                                         |
| EFNA4       | Ligand        | -0.803                    | 0.309                          | -0.122                           | 0.788                                 | -0.748                                   | 0.360                                         |
| DLL3        | Ligand        | -0.196                    | 0.652                          | -0.279                           | 0.733                                 | -0.892                                   | 0.405                                         |
| ADM         | Ligand        | -2.980                    | 0.011                          | 0.205                            | 0.733                                 | -1.099                                   | 0.073                                         |
| GAS6        | Ligand        | 0.123                     | 0.846                          | 0.127                            | 0.814                                 | -1.106                                   | 0.405                                         |
| EFNB3       | Ligand        | -0.357                    | 0.449                          | -0.026                           | 0.950                                 | -1.121                                   | 0.405                                         |
| IL11        | Ligand        | -1.610                    | 0.122                          | 0.407                            | 0.665                                 | -1.173                                   | 0.608                                         |
| PGF         | Ligand        | -0.211                    | 0.721                          | -0.125                           | 0.849                                 | -1.248                                   | 0.238                                         |
| CD70        | Ligand        | -0.121                    | 0.807                          | -0.002                           | 0.999                                 | -1.518                                   | 0.477                                         |
| MDK         | Ligand        | 0.372                     | 0.567                          | -0.357                           | 0.733                                 | -1.616                                   | 0.583                                         |
| NMB         | Ligand        | -0.729                    | 0.215                          | -0.296                           | 0.665                                 | -1.786                                   | 0.405                                         |
